# Supplementary material
Source: PubMed Central journal article supplement (PMC5833224)
Supplement: Supplemental_Table_and_Methods.pdf [file Supplemental_Table_and_Methods.pdf]

Supplemental table S1: Treatment regimens and SVR rates in the intention-to-treat population (ITT3)

| Treatment regimen | Duration of treatment (weeks) | SVR (n) | SVR (%) | Patients with cirrhosis (n) | Cirrhosis (%) | All patients (ITT3, n) |
|-------------------|-------------------------------|---------|---------|-----------------------------|---------------|------------------------|
| BOC/IFN/RBV       | other                         | 3       | 50.0%   | 0                           | 0.00%         | 6                      |
| DCV/SIM           | n.a.                          | 0       | 0.0%    | 1                           | 50.0%         | 2                      |
| DCV/SOF           | 12                            | 298     | 96.1%   | 67                          | 21.6%         | 310                    |
| DCV/SOF           | 24                            | 153     | 95.0%   | 138                         | 85.7%         | 161                    |
| DCV/SOF           | other                         | 39      | 92.9%   | 16                          | 38.1%         | 42                     |
| DCV/SOF/RBV       | 12                            | 9       | 81.8%   | 7                           | 63.6%         | 11                     |
| DCV/SOF/RBV       | 24                            | 29      | 93.5%   | 28                          | 90.3%         | 31                     |
| DCV/SOF/RBV       | other.                        | 4       | 80.0%   | 3                           | 60.0%         | 5                      |
| DCV/SOF/SIM       | n.a.                          | 1       | 100.0%  | 1                           | 100.0%        | 1                      |
| IFN/RBV           | 48                            | 1       | 50.0%   | 0                           | 0.0%          | 2                      |
| IFN/RBV           | other.                        | 13      | 59.1%   | 0                           | 0.0%          | 22                     |
| LDV/SOF           | 12                            | 1,164   | 95.2%   | 175                         | 14.3%         | 1,223                  |
| LDV/SOF           | 24                            | 106     | 94.6%   | 94                          | 83.9%         | 112                    |
| LDV/SOF           | 8                             | 829     | 93.9%   | 22                          | 2.5%          | 883                    |
| LDV/SOF           | other.                        | 120     | 79.5%   | 20                          | 13.3%         | 151                    |
| LDV/SOF/RBV       | 12                            | 329     | 91.6%   | 253                         | 70.5%         | 359                    |
| LDV/SOF/RBV       | 24                            | 65      | 92.9%   | 60                          | 85.7%         | 70                     |
| LDV/SOF/RBV       | 8                             | 6       | 85.7%   | 2                           | 28.6%         | 7                      |
| LDV/SOF/RBV       | other                         | 37      | 80.4%   | 36                          | 78.3%         | 46                     |
| OBV/PTV/r         | n.a.                          | 6       | 75.0%   | 1                           | 12.5%         | 8                      |
| OBV/PTV/r/RBV     | n.a.                          | 4       | 100.0%  | 2                           | 50.0%         | 4                      |
| OBV/PTV/r+DSV     | 12                            | 316     | 92.4%   | 31                          | 9.1%          | 342                    |
| OBV/PTV/r+DSV     | 24                            | 2       | 100.0%  | 2                           | 100.0%        | 2                      |
| OBV/PTV/r+DSV     | other                         | 27      | 81.8%   | 2                           | 6.1%          | 33                     |
| OBV/PTV/r+DSV/RBV | 12                            | 266     | 97.4%   | 119                         | 43.6%         | 273                    |
| OBV/PTV/r+DSV/RBV | 24                            | 12      | 100.0%  | 11                          | 91.7%         | 12                     |
| OBV/PTV/r+DSV/RBV | other                         | 30      | 68.2%   | 20                          | 45.5%         | 44                     |
| SIM/IFN/RBV       | n.a.                          | 3       | 75.0%   | 1                           | 25.0%         | 4                      |
| SIM/SOF           | 12                            | 215     | 87.8%   | 152                         | 62.0%         | 245                    |
| SIM/SOF           | 24                            | 2       | 100.0%  | 0                           | 0.0%          | 2                      |
| SIM/SOF           | other                         | 12      | 80.0%   | 8                           | 53.3%         | 15                     |
| SIM/SOF/RBV       | 12                            | 29      | 93.5%   | 21                          | 67.7%         | 31                     |
| SIM/SOF/RBV       | 24                            | 4       | 100.0%  | 3                           | 75.0%         | 4                      |
| SIM/SOF/RBV       | other                         | 2       | 33.3%   | 4                           | 66.7%         | 6                      |
| SOF               | n.a.                          | 1       | 100.0%  | 0                           | 0.0%          | 1                      |
| SOF/IFN           | n.a.                          | 0       | 0.0%    | 0                           | 0.0%          | 1                      |
| SOF/IFN/RBV       | n.a.                          | 280     | 84.3%   | 66                          | 19.9%         | 332                    |
| SOF/RBV           | 24                            | 17      | 60.7%   | 10                          | 35.7%         | 28                     |
| SOF/RBV           | other.                        | 4       | 80.0%   | 2                           | 40.0%         | 5                      |
| TVR/IFN/RBV       | other.                        | 2       | 40.0%   | 0                           | 0.0%          | 5                      |
| TVR/IFN/RBV       | 24                            | 2       | 100.0%  | 0                           | 0.0%          | 2                      |
| TVR/IFN/RBV       | 48                            | 3       | 100.0%  | 0                           | 0.0%          | 3                      |
| Total             |                               | 4,445   | 91.7%   | 1,378                       | 28.4%         | 4,846                  |

ITT: intention-to-treat, SVR: sustained virological response, SOF: sofosbuvir, IFN: interferon, RBV: ribavirin, SIM: simeprevir, DCV: daclatasvir, LDV: ledipasvir, OBV: ombitasvir, PTV/r: paritaprevir/ritonavir, DSV: dasabuvir;

Supplements:

Material and Methods; Data collection and monitoring:

Patient data were recorded via a web browser based Electronic Data Capture (EDC) system without software installation on site (BEO, e.factum GmbH) hosted at a Clinical Research Organization (CRO). Data quality was reviewed by study monitors via plausibility checks to assure completeness and accuracy. On-site monitoring was conducted in randomly selected sites and when queries had to be solved.

Material and Methods, Statistics:

Due to the ongoing nature of the study, the status of data for this analysis was frozen on June 30, 2016. The statistical analysis was descriptive to reflect the clinical routine as intended by the physicians. Summary statistics (mean, median, standard deviation, 25th percentile, 75th percentile, minimum, maximum, number of values) or frequencies and proportions were assessed dependent on the scale level of the data. Data of specific quantitative variables (platelets, glomerular filtration rate, albumin, HCV-RNA and age) were categorized into groups based on common clinical criteria. In advance, all relevant variables needed to describe the genotype 1 sample were defined in a statistical analysis plan. Univariate and multivariate analyses (logistic regression model (LR), with 95% confidence intervals for the odds ratio (OR) were calculated. Differences were considered significant at  $p \leq 0.05$ . In case of missing data only the available data were analyzed, i.e. missing data were ignored. Analyses were calculated using SPSS Windows Release 22.0.0.2 (IBM©, USA).
